## Review

# *Plasmodium falciparum* Erythrocyte Invasion: Combining Function with Immune Evasion

Gavin J. Wright<sup>1,2\*</sup>, Julian C. Rayner<sup>2\*</sup>

**1** Cell Surface Signalling Laboratory, Wellcome Trust Sanger Institute, Wellcome Trust Genome Campus, Hinxton, Cambridge, United Kingdom, **2** Malaria Programme, Wellcome Trust Sanger Institute, Wellcome Trust Genome Campus, Hinxton, Cambridge, United Kingdom

## Abstract

All the symptoms and pathology of malaria are caused by the intraerythrocytic stages of the *Plasmodium* parasite life cycle. Because *Plasmodium* parasites cannot replicate outside a host cell, their ability to recognize and invade erythrocytes is an essential step for both parasite survival and malaria pathogenesis. This makes invasion a conceptually attractive vaccine target, especially because it is one of the few stages when the parasite is directly exposed to the host humoral immune system. This apparent vulnerability, however, has been countered by the parasite, which has evolved sophisticated molecular mechanisms to evade the host immune response so that parasites asymptotically replicate within immune individuals. These mechanisms include the expansion of parasite invasion ligands, resulting in multiple and apparently redundant invasion “pathways,” highly polymorphic parasite surface proteins that are immunologically distinct, and parasite proteins which are poorly immunogenic. These formidable defences have so far thwarted attempts to develop an effective blood-stage vaccine, leading many to question whether there really is an exploitable chink in the parasite’s immune evasion defences. Here, we review recent advances in the molecular understanding of the *P. falciparum* erythrocyte invasion field, discuss some of the challenges that have so far prevented the development of blood-stage vaccines, and conclude that the parasite invasion ligand RH5 represents an essential pinch point that might be vulnerable to vaccination.

## The *Plasmodium falciparum* Merozoite: A Dedicated Invasion Machine

Throughout their extraordinarily complex life cycle, *Plasmodium* parasites must navigate a wide range of intracellular and extracellular environments in both vertebrates and invertebrates. To achieve this, the parasite develops into a series of distinct morphological forms or “zoites,” each of which is specialised for a particular biological challenge. Merozoites—ovoid cells approximately 1  $\mu\text{m}$  long that are released from an infected erythrocyte once development is complete—are the epitome of a specialised *Plasmodium* stage. Merozoites do not replicate outside of their host: they exist purely to find and invade erythrocytes. To do so, they undergo a series of complex manoeuvres, first visualised by pioneering video microscopy and electron microscopy studies more than 30 years ago [1,2]. Initial contacts between the merozoite and erythrocyte can occur at any point on the merozoite surface, which are rapidly followed by the reorientation of the polar merozoite such that its apical end directly apposes the erythrocyte membrane (see Figure 1). This allows the parasite to deploy a series of specialised apically located secretory organelles:

rhoptries, micronemes, and dense granules. These organelles then discharge their contents in a regulated and ordered schedule during and immediately after the invasion process at the site of contact [3–5]. Ligands released in this manner interact with erythrocyte surface receptors to form an electron-dense thickening of the erythrocyte membrane at the nexus of erythrocyte–merozoite contact. The junction is passed around the merozoite surface in a belt-like structure, driven by an actin-myosin motor that is anchored to the merozoite’s inner membrane complex (IMC), which contributes to the formation and maintenance of the merozoite’s characteristic ovoid shape [6,7]. Invasion is completed as the moving junction closes behind the merozoite in the fashion of an iris diaphragm, leaving the merozoite enclosed within a parasitophorous vacuole.

The overall process of invasion may be complex, but it is also extremely rapid. A series of recent studies all concur that invasion is complete, on average, less than two minutes after merozoites are released [8,9]. Why the need for speed? The answer likely lies in the fact that the merozoite is one of the few stages of the *Plasmodium* life cycle in which the parasite is extracellular and therefore directly exposed to immunological attack (see Figure 2). To survive, the parasite must restrict its window of exposure to minimise neutralization by complement mediated lysis or opsonisation by host-derived antibodies. Speed alone, however, is not enough, and the merozoite also deploys an array of escape mechanisms to keep the immune system at bay long enough to complete the invasion process. Understanding these mechanisms is more than simply an interesting biological question. Because erythrocyte invasion is an obligate part of the parasite’s lifecycle, blocking invasion should prevent parasite growth, making invasion an attractive vaccine target. However, vaccine trials targeting invasion have faltered, most likely because they have been countered by one or more of the merozoite’s immune-evasion mechanisms. It is only by understanding the parasite’s immunoprotective mechanisms that we can hope to identify and exploit weak points that could be targeted by a vaccine.

**Citation:** Wright GJ, Rayner JC (2014) *Plasmodium falciparum* Erythrocyte Invasion: Combining Function with Immune Evasion. PLoS Pathog 10(3): e1003943. doi:10.1371/journal.ppat.1003943

**Published:** March 20, 2014

**Copyright:** © 2014 Wright, Rayner. This is an open-access article distributed under the terms of the Creative Commons Attribution License, which permits unrestricted use, distribution, and reproduction in any medium, provided the original author and source are credited.

**Funding:** This work was supported by the Wellcome Trust (grant number 098051) and the UK Medical Research Council (grant number MR/J002283/1). The funders had no role in study design, data collection and analysis, decision to publish, or preparation of the manuscript.

**Competing Interests:** The authors have a patent application related to the utility of *Plasmodium falciparum* merozoite antigens as vaccine candidates. This does not alter our adherence to all PLOS policies on sharing data and materials.

\* E-mail: gw2@sanger.ac.uk (GJW); julian.rayner@sanger.ac.uk (JCR)

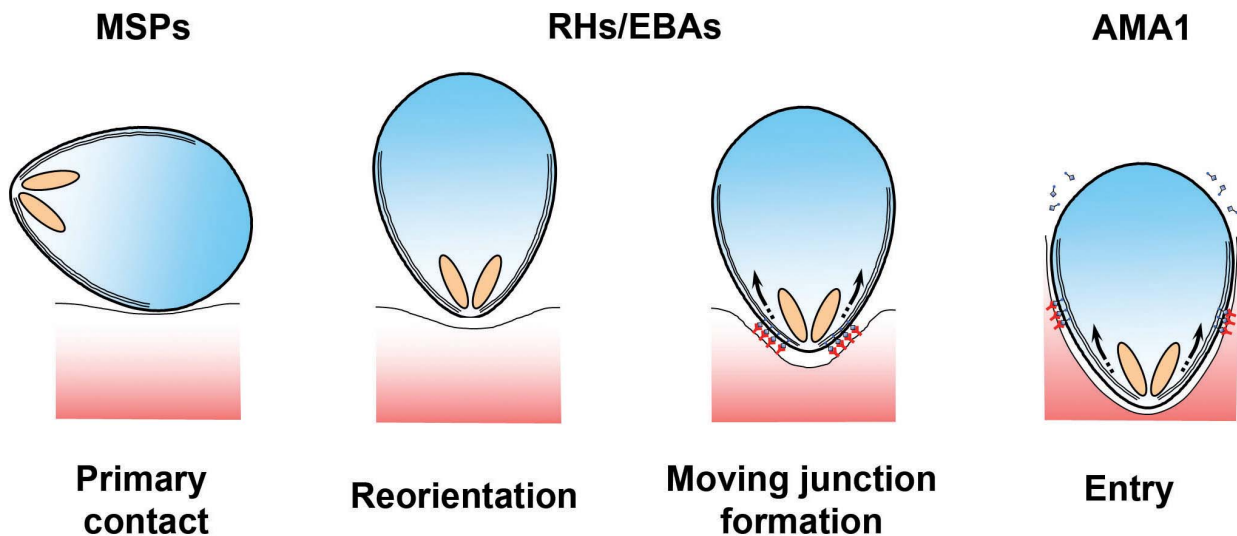

**Figure 1. Erythrocyte invasion is a complex multistep process.** The different stages of erythrocyte invasion are drawn in cartoon form. The different protein families discussed in this review are thought to operate at different steps during invasion, with MSPs functioning at the very earliest stages, PfrRH and PfEBAs functioning during the formation of a tight contact between the merozoite apex and the erythrocyte surface, and the AMA1- RON interaction being tightly associated with the moving junction itself [4,17]. Detailed reviews of the molecular and ultrastructural basis of invasion are available in other reviews [15–17,24].  
doi:10.1371/journal.ppat.1003943.g001

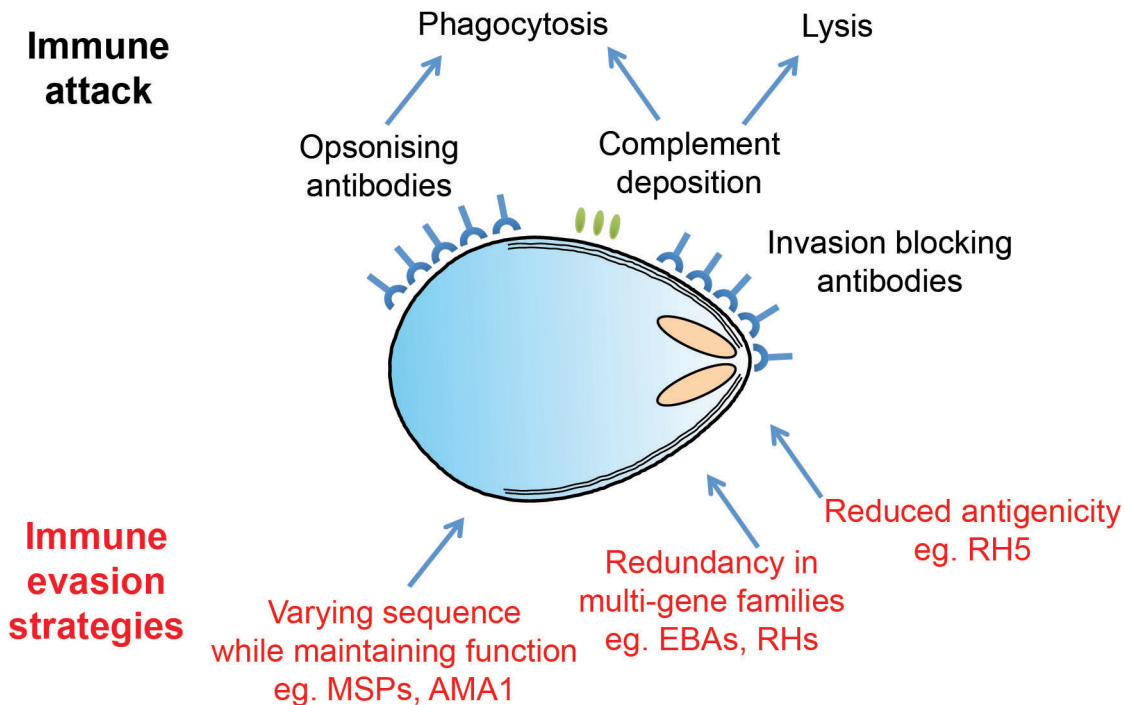

**Figure 2. *Plasmodium* merozoites face an array of immunological challenges.** Merozoites are the only extracellular stage of the *Plasmodium* life cycle and are therefore exposed to an array of immune attack mechanisms, as illustrated in cartoon form. Merozoite antigens are known to be the target of antibody responses, which operate both by opsonisation leading to phagocytosis and by simple steric hindrance of receptor-ligand interactions critical for invasion. Complement deposition on the merozoite surface may also play a role in parasite clearance. To avoid these attack mechanisms, *Plasmodium* parasites have evolved a number of distinct evasion responses. Some merozoite antigens such as AMA1 are highly polymorphic, while members of the PfrRH and EBA multigene families are largely redundant and have variable expression profiles. Both of these strategies slow the development of protective immunity by forcing the antibody response to efficiently recognize multiple targets in order to mount an effective response. Finally, RH5 appears to be poorly immunogenic in the context of natural infections, perhaps due to limited levels of expression and exposure.  
doi:10.1371/journal.ppat.1003943.g002

## Distraction through Diversity

Given the complexity of the invasion process, it is no surprise that the merozoite expresses a diverse array of invasion-associated proteins. The combination of genome sequencing [10], large-scale gene [11,12] and protein profiling studies [13,14], together with the rapid expansion in *P. falciparum*—experimental genetic technologies [15] have identified more than 50 *P. falciparum* proteins that are hypothesised to somehow be involved in the invasion process, although in the vast majority of cases their precise function is unknown. The most well-studied of these have been organised into distinct functional classes: MSPs (merozoite surface proteins), which form a structurally complex coat around the merozoite surface, and the PfEBAs (*P. falciparum* erythrocyte binding antigens, related to the *P. vivax* duffy binding protein) and PfRHs (*P. falciparum* reticulocyte binding protein [RBP] homologues, related to the *P. vivax* RBPs [PvRBPs]), which are stored in specialised apical organelles, the rhoptries and micronemes [16,17].

PfRHs and PfEBAs are generally thought to function later during invasion, and at least some members may be released on to the merozoite surface in a regulated manner after the initial merozoite–erythrocyte contact has been made [5,18]. MSPs, by contrast, are thought to function during the initial contact phases of invasion and are exposed to antibodies as soon as the merozoite is released into the bloodstream. To avoid the host immune response, many MSPs are highly polymorphic, and MSP genes frequently bear signatures of being under balancing selection pressure [19,20], resulting in the simultaneous circulation of multiple variants of the same gene within a population. Several of the most abundant MSPs, such as MSP1 and MSP2, are diallelic, with multiple variants found within each allelic class. Other MSPs are part of multigene families, and in some cases, such as the 6-cys proteins, a clonally variant expression system results in the expression of different members of each family in different parasite lines [20]. Together, these diversity-generating mechanisms can result in immunologically distinct merozoites within a single infected individual, especially if they are simultaneously infected with multiple, genetically distinct strains. In such a circumstance, even a primed immune system is unlikely to effectively block the invasion of all merozoites within their fleeting period of extracellular exposure.

This distraction-through-diversity approach is highly effective. Host antibody responses to MSPs are often very strong in adults who have been previously infected with *P. falciparum* on multiple occasions, and the anti-merozoite immune responses that they generate are known to be able to reduce the effectiveness of parasite invasion [21]. Despite this, immunity to *P. falciparum* is only ever partially effective, with populations of parasites continuing to multiply even within adults who are clinically immune—their immune responses may limit symptoms, but are not sufficient to eradicate parasites. This stark fact highlights the challenge facing the development of invasion-blocking vaccines. It could theoretically be possible to develop multivalent vaccines that target multiple genetic variants of a given MSP, but the outcome, at best, is likely to only ever recapitulate natural immunity—a partial block that might be sufficient to prevent disease (itself, a worthy goal) but is unlikely to be sufficient to prevent infection or contribute significantly to the goal of malaria eradication. It should be noted that although high levels of diversity are the rule for MSPs, subdomains of specific MSPs can be highly conserved and, therefore, have potential as vaccine targets. The C-terminal domain of MSP1, MSP1-19, is by far the most well-studied example of this, and antibodies that target MSP1-19 can have potent invasive inhibitory effects [22]. Despite these attractive

features, Phase IIb trials of a region of MSP1 that includes MSP1-19 were disappointing, suggesting that a more in-depth understanding of this target is necessary [23].

## Elucidating the Molecular Mechanisms of Invasion Reveals Redundancy

Not only are MSPs often highly polymorphic, making them challenging targets, they also generally have poorly defined functions. A more rational approach would be to use a mechanistic understanding of the parasite and host molecules involved in invasion to identify targets for a potential invasion-blocking therapeutic. For many years, invasion research has focused on the role of the PfRHs and PfEBAs, and this work has led to significant advances in mechanistic understanding [16,24]. However, the potential of PfRHs and PfEBAs as intervention targets has been compounded by another evasion mechanism used by the parasite—functional redundancy. It has been known for some time that *P. falciparum* merozoites can use several alternative pathways to invade human erythrocytes. The definition of what exactly constitutes an “alternative invasion pathway” is not clear, and the area in general is in urgent need of a systematic overhaul and agreement on terminology. A simple and pragmatic definition is that when the repertoire of available erythrocyte receptors is restricted in vitro either by enzyme treatment (generally with trypsin, chymotrypsin, or neuraminidase) or through the use of erythrocytes from human donors with defined blood groups, there can be a range of phenotypic outcomes depending on the *P. falciparum* strain. Culture-adapted *P. falciparum* strains have long been known to have differential abilities to invade both enzyme-treated erythrocytes [25] and erythrocytes from individuals that lack expression of specific surface receptors [26,27]. Similar observations have been made using field isolates, both in strains that have recently been adapted to in vitro culture [28], and in parasites that have never been adapted but were phenotyped in their first round of invasion in vitro [29,30]. A large body of experimental data suggests that it is the PfRH and PfEBA protein families that are responsible for this functional redundancy: when individual ligands in these families are genetically deleted, a change in the ability of the parasites to invade enzyme-treated erythrocytes is the most commonly observed phenotype [31–34]. Similar effects can be observed by the addition of antibodies directed to the RHs (reticulocyte binding protein homologues) or EBAs (erythrocyte binding antigens) in parasite growth assays [35–37].

It is almost certain that the parasite has evolved this functional redundancy in invasion ligands to counter the host humoral immune response. As noted above, members of the EBA and RH family are known to be targets of host antibodies, and so if the parasite relied on a single ligand for the later stages of invasion, the host could logically acquire sterile protective immunity to the parasite. The parasite’s answer to this seems to have been to expand these two protein families, creating multiple paralogues and thereby presenting the host immune system with the more complex problem of blocking several ligands. The relative functional weighting on any one particular EBA or RH ligand is presumably governed by many factors, including their relative expression levels [29,30,33], differences in amino acid sequences between strains [38,39], and the host genotype and immunological status (Figure 3). Parasite genetic background certainly has a major impact on the importance of a given receptor–ligand interaction. This is most starkly apparent in the case of PfEBA and PfRH genetic knockouts, where PfEBA175 deletion results in a major shift away from neuraminidase sensitive invasion in W2mef but not 3D7 [40,41]. PfRH1 deletion also has differential effects depending on the strain [41]. This implies a hierarchy of

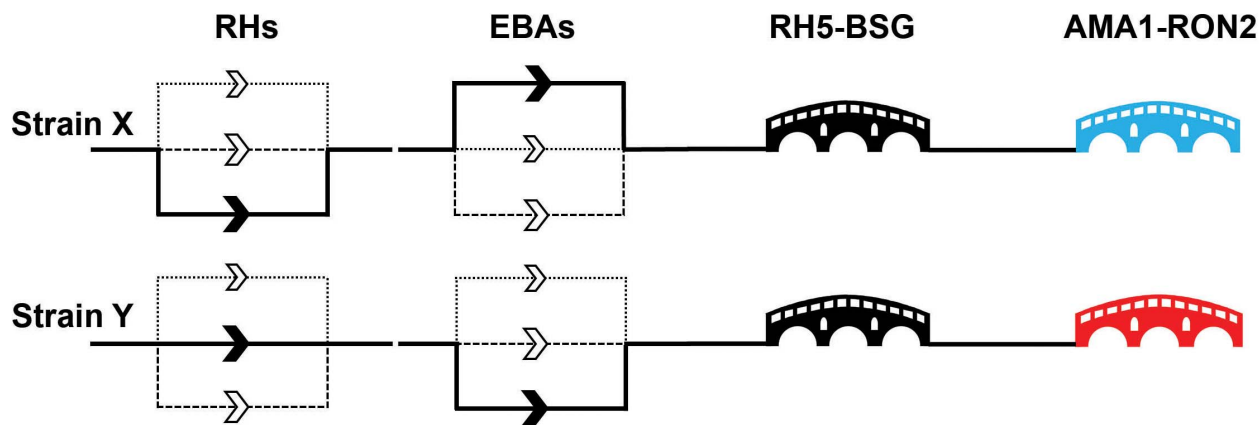

**Figure 3. A molecular understanding of invasion leads to the identification of critical target points.** The invasion events controlled by the paralogues within the EBA and RH families are thought to be redundant with the relative importance of individual genes differing between strains. This leads to a model of invasion where there are a number of parallel “alternative invasion pathways,” as indicated by multiple routes in the diagram for two nominal strains (X and Y). The differential dependencies on particular EBA and RH paralogues is indicated by the weighting of the line, with the unbroken line representing a major dependency and the dashed and dotted lines nonpreferred pathways for that strain. By contrast, the nonredundant RH5–basigin and AMA1–RON2 interactions are represented by critical “bridges.” The immunogenic AMA1 protein is highly variable between strains and is therefore represented by different colours: neutralising host antibodies elicited by one AMA1 variant would not protect against a strain containing a different AMA1 variant. In natural infections, RH5 is not immunogenic, suggesting that the parasite has protected this critical stage by an immunomodulatory mechanism.

doi:10.1371/journal.ppat.1003943.g003

interactions within the PfRH and PfEBA paralogues, with the relative importance of each interaction being strain-specific, as has been elegantly proposed by previous papers [32,34,42].

While the overall point that variation in PfRH and PfEBA ligands is the explanation for redundancy in invasion pathways, we believe that a few notes of caution are needed, especially when interpreting in vitro genetic studies. PfRH and PfEBA ligands are often discussed as if they are completely functionally interchangeable, but this is likely to be an oversimplification. Both gene families are deeply phylogenetically rooted and all *Plasmodium* genomes sequenced to date contain at least one member of each family. If they were precisely functionally equivalent, it would be expected that one family would have been lost in at least one *Plasmodium* species, but instead most genomes actually have an expansion of one or both families, with multiple paralogues present. Their functions may therefore be subtly distinct; for example, it is proposed that the primary function of the PfRHs is to propagate a signal that triggers the subsequent release of the PfEBAs [24]. However, while PfRH and PfEBA ligands may not be strict functional alternatives, some members are certainly able to compensate for each other in particular contexts, at least in vitro, such as the up-regulation of *RH4* transcription in *EBA175* knockout lines [33].

The expansion of the EBA and RH families in *P. falciparum* and the consequent redundancy and complexity that it creates means that several of these ligands would have to be simultaneously targeted to effectively reduce or block all invasion. This makes the development of such a vaccine technically challenging, although initial trials with PfRH and PfEBA combinations do show some promise [32,43,44]. However, while such combinations may be viable vaccines, the extent of natural diversity in the expression and sequences of PfRH and PfEBA means that they will need to be tested against a very wide range of natural isolates before their potential can be truly assessed, and these trials have not yet been conducted. It also remains to be seen whether clinical trial funders will be prepared to meet the higher manufacturing cost of a multivalent vaccine. Furthermore, it is worth pointing out that the design of some Phase IIa vaccine trials where subjects are experimentally infected can set a very high bar for efficacy [45].

In these trials, curative drug treatment must be applied as soon as parasites are detected by PCR in the blood, for quite understandable health and ethical reasons. This means that the trial tests parasite multiplication rate, rather than protection from symptoms that would be the more likely outcome of multivalent EBA/RH vaccines. Vaccines could therefore conceivably fail in such a Phase IIa trial, but still provide significant symptomatic protection in a natural infection. It is therefore likely that we will either have to abandon these complex targets, or change the design of vaccine trials to allow us to better detect their effects, for example, by including dose escalation studies to enable the detection of effects that may be visible only at low starting parasitemias.

### Identifying the Critical Bridges during Invasion

Are there any other invasion ligands that could be targeted that avoid the problem of PfRH and EBA redundancy? So far, there are two parasite ligands that can be targeted by antibodies to induce a potent block in invasion and also appear to be essential and nonredundant, as attempts to genetically delete them have failed. Both have known receptors: PfRH5 and its erythrocyte receptor, basigin, and AMA1 (apical membrane antigen) and its parasite-encoded receptor, RON2 (rhoptry neck protein) (see Figure 3).

#### AMA1–RON2

AMA1 is undoubtedly an important parasite invasion ligand. Readily identifiable AMA1 orthologues exist across the genus *Apicomplexa*, and genetic deletion experiments have largely shown that they are essential [46,47], although the recent report that AMA1 is not absolutely required for invasion by *P. berghei* merozoites will require detailed follow-up using tightly regulatable systems in other *Plasmodium* species [48]. AMA1 is a micronemal type I transmembrane protein that translocates to the surface of invasive zoites, including the *P. falciparum* merozoite [49], and is localised at the moving junction during invasion. Its precise function during erythrocyte invasion is not entirely clear and has been proposed to play a role in merozoite reorientation [50], erythrocyte binding [51,52], invasion efficiency [53], rhoptry

secretion [54,55], and formation of the moving junction [4,56,57]. Copurification experiments [57,58] and subsequent structural studies [59,60] have led to a model in which the parasite inserts its own AMA1 receptor complex into the target cell membrane. The RON complex (RON2, 4, 5, and 8) are secreted from the rhoptries, and the RON2 protein presents a surface-exposed loop that is inserted into a hydrophobic groove in the AMA1 ectodomain, thereby providing a receptor–ligand pair for invasion. This model is supported by functional data that demonstrate that either antibodies against AMA1 [61,62] or short, soluble peptides that bind in or near the groove block invasion [60,63].

Given its important role in parasite invasion, AMA1 has been a high priority blood-stage vaccine candidate for many years [62,64], but the general conclusion from multiple trials has been that vaccine-induced invasion-blocking antibody responses to AMA1 are strain-specific and therefore provide protection only to vaccine-homologous parasite strains [65,66]; that is to say, only strains that encode an AMA1 variant immunologically similar or identical to the AMA1 protein sequence variant used in the vaccine are inhibited. Interestingly, this means that the AMA1 protein has the remarkable property of retaining its functional role during invasion whilst tolerating many sequence variants that are immunologically distinct. It therefore appears that the parasite protects AMA1 by evolving a spectrum of variants to create an ever-moving target which is difficult to vaccinate against, similar to the MSPs. This makes the AMA1–RON complex a challenging vaccine target, albeit one that is potentially solvable by the inclusion of multiple AMA1 variants [67] or by targeting the RON complex, rather than AMA1 itself.

### RH5–basigin

Recently, another merozoite–erythrocyte interaction was identified that also appears to function as an essential pinch point in the invasion pathway: that between the parasite ligand RH5 and the Ok blood group antigen, basigin. Originally identified by analysing the *P. falciparum* genome sequence [68], RH5 was grouped into the RH family of parasite ligands by the presence of some—albeit limited—sequence homology [69]. RH5 differs from other PfRH family members because it is much smaller and is predicted to be secreted rather than anchored to the parasite membrane, and it is known to interact with another secreted parasite protein, RIPR [70]. Like AMA1, RH5 is also localised to the moving junction during invasion [71] and attempts to genetically delete *RH5* in several strains were unsuccessful [68,71], suggesting it played an important role in blood stage growth. Its essentiality in the invasion process was reinforced by the identification of its receptor, basigin [72], using a protein interaction screening method called AVEIXIS (avidity-based extracellular interaction screen) [73]. Importantly, monoclonal antibodies against the basigin receptor were able to completely block all detectable invasion across a panel of different laboratory-adapted parasite strains and recent field isolates [72]. Unlike AMA1, identifiable orthologues of PfRH5 have only been identified in one closely related species, *P. reichenowi* [74], and not in the other major human malaria species such as *P. vivax*. *RH5* also differs from *AMA1* in that its polymorphism is very limited within *P. falciparum* populations, suggesting that it is not under significant immune selection pressure [75,76]. Consistent with this, polyclonal or monoclonal antibodies raised against RH5, either using a viral delivery system [77] or using a recombinant RH5 protein expressed using either eukaryotic or prokaryotic expression systems [76,78,79], are able to prevent parasite growth in vitro. Importantly, and by contrast with AMA1, this blocking effect is effective across multiple strains of parasite, including those parasite

strains that contain the most frequently observed polymorphisms in *RH5* globally [76].

This raises an apparent paradox. Naturally acquired immunity to malaria is typically not sterile, yet antibodies against RH5 can potentially block invasion across multiple strains; that is, they should be able to provide sterile protection. One would, therefore, logically infer that clinically immune adults should not have high titres of anti-RH5 antibodies, because if they did, they would be sterilely protected and lack detectable parasitemia. Although studies of anti-RH5 responses are limited, anti-RH5 responses were low in Kenyan adults and showed no evidence of age-dependent acquisition [77]; only 15% of serum samples from Senegal were seropositive for anti-RH5 responses [80], while in a large comparative study in Papua New Guinea, RH5 had one of the lowest seropositivity rates of the 91 merozoite proteins tested [81]. Despite their relatively low prevalence, anti-RH5 antibodies purified from human immune serum had strong invasion inhibitory effects [80], and in a time-to-reinfection study in Mali, the presence of anti-RH5 antibodies was strongly associated with protection from malaria episodes [82]. While much more work is clearly needed, the lower levels of anti-RH5 response observed to date suggests that the parasite has evolved a third mechanism to evade host immune responses to a critical point in the invasion pathway, distinct from the redundancy and polymorphism that protect other invasion proteins: the ability to produce a protein that is not—at least in the context of a natural infection—immunogenic. The mechanism by which the RH5 protein is able to evade the human humoral immune response is currently not known, but it could be due to limited levels of expression and exposure or through an active immunomodulatory mechanism involving a direct interaction with additional host proteins. Importantly for the use of RH5 as a vaccine, this ability to evade the host antibody responses appears to be context-specific since high-titre antisera can be raised to a recombinant RH5 protein/adjuvant mix in rabbits [76] and mice [77]. However, the apparently low immunogenicity of native RH5 may prevent significant levels of natural boosting following vaccination, which could affect the induction or longevity of any RH5 vaccine-induced response. Nonetheless, the pan-strain dependency on the interaction of RH5 with basigin for invasion and its susceptibility to elicited antibodies make RH5 a highly promising target for a blood-stage vaccine, either alone or in combination with other synergistic targets [83], and further trials are clearly justified.

### Conclusions and Future Directions

Given that it is essential for the survival of blood-stage parasites, erythrocyte invasion has long been viewed as a point in the life cycle that could be rationally targeted in the development of an anti-malarial vaccine. Although vaccine development priorities have recently become focused primarily on transmission blocking and pre-erythrocytic stages, the development of the RTS,S vaccine reinforces the fact that vaccines directed at a single target are never likely to be 100% effective. Furthermore, a highly effective blood-stage vaccine will, by definition, affect transmission by reducing the pool of ring-stage parasites capable of gametocyte differentiation. It is our strong opinion that invasion targets must be considered as crucial components of any second-generation multistage malaria vaccine. However, one of the very features of invasion that make it an attractive vaccine target—its exposure to the antibody-mediated immune response—also makes it a difficult target, because the host–parasite “arms race” has forced the parasite to evolve sophisticated immunoprotective mechanisms to shield itself. In particular, the parasite has protected the MSPs and

RH/EBA ligands by generating sequence diversity and functional redundancy, resulting in parasites that use experimentally definable alternative invasion pathways that are difficult to target. One possible way to circumvent this problem would be to generate a multicomponent vaccine that attempts to neutralise all alternative ligands, but this is likely to be expensive to manufacture, and at best may simply recapitulate the partial protection found in clinically immune adults. Nonredundant interactions essential for invasion (AMA1–RON2 and RH5–basigin) make conceptually more attractive targets, but perhaps unsurprisingly, the parasite has evolved mechanisms to protect these critical invasion ligands. Intriguingly, however, the parasite protects AMA1 and RH5 from the host immune response by different mechanisms: it protects AMA1 by creating a series of immunologically distinct variants, while native RH5 appears immunoprotected. Critically, RH5 does not appear to be intrinsically nonimmunogenic since high antibody titres to RH5 are readily

obtained in experimental models, and can potentially inhibit invasion *in vitro* [76,77]. This raises the possibility that the parasite's immunoprotective mechanisms could be circumvented by eliciting unnatural immunity with an RH5-based vaccine. One of the primary challenges in RH5 vaccine development will clearly be identifying adjuvants that raise sufficiently high antibody titres in the absence of immune boosting. However given the lack of success to date in circumventing the merozoite's immune evasion mechanisms, developing a potent anti-RH5 immune response and identifying other targets that functionally synergise with such responses represents the current best hope for an invasion-blocking vaccine.

## Acknowledgments

We are grateful to Cécile Crosiner and Leyla Bustamante for helpful comments on the manuscript.

## References

- Aikawa M, Miller LH, Rabbege JR, Epstein N (1981) Freeze-fracture study on the erythrocyte membrane during malarial parasite invasion. *J Cell Biol* 91: 55–62.
- Dvorak JA, Miller LH, Whitehouse WC, Shiroishi T (1975) Invasion of erythrocytes by malaria merozoites. *Science* 187: 748–750.
- Hanssen E, Dekiwadia C, Riglar DT, Rug M, Lemgruber L, et al. (2013) Electron tomography of *Plasmodium falciparum* merozoites reveals core cellular events that underpin erythrocyte invasion. *Cell Microbiol* 15: 1457–1472.
- Riglar DT, Richard D, Wilson DW, Boyle MJ, Dekiwadia C, et al. (2011) Super-resolution dissection of coordinated events during malaria parasite invasion of the human erythrocyte. *Cell Host Microbe* 9: 9–20.
- Singh S, Alam MM, Pal-Bhowmick I, Brzostowski JA, Chitnis CE (2010) Distinct external signals trigger sequential release of apical organelles during erythrocyte invasion by malaria parasites. *PLOS Pathog* 6: e1000746. doi:10.1371/journal.ppat.1000746
- Baum J, Richard D, Healer J, Rug M, Krnajska Z, et al. (2006) A conserved molecular motor drives cell invasion and gliding motility across malaria life cycle stages and other apicomplexan parasites. *J Biol Chem* 281: 5197–5208.
- Jones ML, Kitson EL, Rayner JC (2006) *Plasmodium falciparum* erythrocyte invasion: a conserved myosin associated complex. *Mol Biochem Parasitol* 147: 74–84.
- Glushakova S, Yin D, Li T, Zimmerberg J (2005) Membrane transformation during malaria parasite release from human red blood cells. *Curr Biol* 15: 1645–1650.
- Gilson PR, Crabb BS (2009) Morphology and kinetics of the three distinct phases of red blood cell invasion by *Plasmodium falciparum* merozoites. *Int J Parasitol* 39: 91–96.
- Gardner MJ, Hall N, Fung E, White O, Berriman M, et al. (2002) Genome sequence of the human malaria parasite *Plasmodium falciparum*. *Nature* 419: 498–511.
- Bozdech Z, Llinas M, Pulliam BL, Wong ED, Zhu J, et al. (2003) The transcriptome of the intraerythrocytic developmental cycle of *Plasmodium falciparum*. *PLOS Biol* 1: E5. doi:10.1371/journal.pbio.0000005
- Le Roch KG, Zhou Y, Blair PL, Grainger M, Moch JK, et al. (2003) Discovery of gene function by expression profiling of the malaria parasite life cycle. *Science* 301: 1503–1508.
- Sanders PR, Gilson PR, Cantin GT, Greenbaum DC, Nebl T, et al. (2005) Distinct protein classes including novel merozoite surface antigens in Raft-like membranes of *Plasmodium falciparum*. *J Biol Chem* 280: 40169–40176.
- Gilson PR, Nebl T, Vukcevic D, Moritz RL, Sargeant T, et al. (2006) Identification and stoichiometry of glycosylphosphatidylinositol-anchored membrane proteins of the human malaria parasite *Plasmodium falciparum*. *Mol Cell Proteomics* 5: 1286–1299.
- Cowman AF, Berry D, Baum J (2012) The cellular and molecular basis for malaria parasite invasion of the human red blood cell. *J Cell Biol* 198: 961–971.
- Tham WH, Healer J, Cowman AF (2012) Erythrocyte and reticulocyte binding-like proteins of *Plasmodium falciparum*. *Trends Parasitol* 28: 23–30.
- Harvey KL, Gilson PR, Crabb BS (2012) A model for the progression of receptor-ligand interactions during erythrocyte invasion by *Plasmodium falciparum*. *Int J Parasitol* 42: 567–573.
- Gao X, Gunalan K, Yap SS, Preiser PR (2013) Triggers of key calcium signals during erythrocyte invasion by *Plasmodium falciparum*. *Nat Commun* 4: 2862.
- Amambua-Ngwa A, Tetteh KK, Manske M, Gomez-Escobar N, Stewart LB, et al. (2012) Population genomic scan for candidate signatures of balancing selection to guide antigen characterization in malaria parasites. *PLOS Genet* 8: e1002992. doi:10.1371/journal.pgen.1002992
- Rovira-Graells N, Gupta AP, Planet E, Crowley VM, Mok S, et al. (2012) Transcriptional variation in the malaria parasite *Plasmodium falciparum*. *Genome Res* 22: 925–938.
- Fowkes FJ, Richards JS, Simpson JA, Beeson JG (2010) The relationship between anti-merozoite antibodies and incidence of *Plasmodium falciparum* malaria: A systematic review and meta-analysis. *PLOS Med* 7: e1000218. doi:10.1371/journal.pmed.1000218
- Moss DK, Remarque EJ, Faber BW, Cavanagh DR, Arnot DE, et al. (2012) *Plasmodium falciparum* 19-kilodalton merozoite surface protein 1 (MSP1)-specific antibodies that interfere with parasite growth *in vitro* can inhibit MSP1 processing, merozoite invasion, and intracellular parasite development. *Infect Immun* 80: 1280–1287.
- Ogutu BR, Apollo OJ, McKinney D, Okoth W, Siangla J, et al. (2009) Blood stage malaria vaccine eliciting high antigen-specific antibody concentrations confers no protection to young children in Western Kenya. *PLOS One* 4: e4708. doi:10.1371/journal.pone.0004708
- Gunalan K, Gao X, Yap SS, Huang X, Preiser PR (2013) The role of the reticulocyte-binding-like protein homologues of *Plasmodium* in erythrocyte sensing and invasion. *Cell Microbiol* 15: 35–44.
- Mitchell GH, Hadley TJ, McGinniss MH, Klotz FW, Miller LH (1986) Invasion of erythrocytes by *Plasmodium falciparum* parasites: evidence for receptor heterogeneity and two receptors. *Blood* 67: 1519–1521.
- Hadley TJ, Klotz FW, Pasvol G, Haynes JD, McGinniss MH, et al. (1987) *Falciparum* malaria parasites invade erythrocytes that lack glyophorin A and B (MkMk). Strain differences indicate receptor heterogeneity and two pathways for invasion. *J Clin Invest* 80: 1190–1193.
- Dolan SA, Proctor JL, Alling DW, Okubo Y, Wellems TE, et al. (1994) Glycophorin B as an EBA-175 independent *Plasmodium falciparum* receptor of human erythrocytes. *Mol Biochem Parasitol* 64: 55–63.
- Okoye JN, Pillai CR, Chitnis CE (1999) *Plasmodium falciparum* field isolates commonly use erythrocyte invasion pathways that are independent of sialic acid residues of glycophorin A. *Infect Immun* 67: 5784–5791.
- Bei AK, Membi CD, Rayner JC, Mubi M, Ngasala B, et al. (2007) Variant merozoite protein expression is associated with erythrocyte invasion phenotypes in *Plasmodium falciparum* isolates from Tanzania. *Mol Biochem Parasitol* 153: 66–71.
- Gomez-Escobar N, Amambua-Ngwa A, Walther M, Okebe J, Ebonyi A, et al. (2010) Erythrocyte invasion and merozoite ligand gene expression in severe and mild *Plasmodium falciparum* malaria. *J Infect Dis* 201: 444–452.
- Duraisingh MT, Triglia T, Ralph SA, Rayner JC, Barnwell JW, et al. (2003) Phenotypic variation of *Plasmodium falciparum* merozoite proteins directs receptor targeting for invasion of human erythrocytes. *Embo J* 22: 1047–1057.
- Lopaticki S, Maier AG, Thompson J, Wilson DW, Tham WH, et al. (2011) Reticulocyte and erythrocyte binding-like proteins function cooperatively in invasion of human erythrocytes by malaria parasites. *Infect Immun* 79: 1107–1117.
- Stubbs J, Simpson KM, Triglia T, Plouffe D, Tonkin CJ, et al. (2005) Molecular mechanism for switching of *P. falciparum* invasion pathways into human erythrocytes. *Science* 309: 1384–1387.
- DeSimone TM, Jennings CV, Bei AK, Comeaux C, Coleman BI, et al. (2009) Cooperativity between *Plasmodium falciparum* adhesive proteins for invasion into erythrocytes. *Mol Microbiol* 72: 578–589.
- Richards JS, Stanicic DI, Fowkes FJ, Tavul L, Dabod E, et al. (2010) Association between naturally acquired antibodies to erythrocyte-binding antigens of *Plasmodium falciparum* and protection from malaria and high-density parasitemia. *Clin Infect Dis* 51: e50–60.
- Reiling L, Richards JS, Fowkes FJ, Wilson DW, Chokejindachai W, et al. (2012) The *Plasmodium falciparum* erythrocyte invasion ligand Pfhr4 as a target of

- functional and protective human antibodies against malaria. *PLOS One* 7: e45253. doi:10.1371/journal.pone.0045253
37. Reiling L, Richards JS, Fowkes FJ, Barry AE, Triglia T, et al. (2010) Evidence that the erythrocyte invasion ligand PIRh2 is a target of protective immunity against *Plasmodium falciparum* malaria. *J Immunol* 185: 6157–6167.
  38. Mayer DC, Mu JB, Feng X, Su XZ, Miller LH (2002) Polymorphism in a *Plasmodium falciparum* erythrocyte-binding ligand changes its receptor specificity. *J Exp Med* 196: 1523–1528.
  39. Mayer DC, Mu JB, Kaneko O, Duan J, Su XZ, et al. (2004) Polymorphism in the *Plasmodium falciparum* erythrocyte-binding ligand JESEBL/EBA-181 alters its receptor specificity. *Proc Natl Acad Sci U S A* 101: 2518–2523.
  40. Duraisingh MT, Maier AG, Triglia T, Cowman AF (2003) Erythrocyte-binding antigen 175 mediates invasion in *Plasmodium falciparum* utilizing sialic acid-dependent and -independent pathways. *Proc Natl Acad Sci U S A* 100: 4796–4801.
  41. Triglia T, Duraisingh MT, Good RT, Cowman AF (2005) Reticulocyte-binding protein homologue 1 is required for sialic acid-dependent invasion into human erythrocytes by *Plasmodium falciparum*. *Mol Microbiol* 55: 162–174.
  42. Baum J, Maier AG, Good RT, Simpson KM, Cowman AF (2005) Invasion by *P. falciparum* merozoites suggests a hierarchy of molecular interactions. *PLOS Pathog* 1: e37. doi:10.1371/journal.ppat.0010037
  43. Persson KE, Fowkes FJ, McCallum FJ, Gicheru N, Reiling L, et al. (2013) Erythrocyte-binding antigens of *Plasmodium falciparum* are targets of human inhibitory antibodies and function to evade naturally acquired immunity. *J Immunol* 191: 785–794.
  44. Pandey AK, Reddy KS, Sahar T, Gupta S, Singh H, et al. (2013) Identification of a potent combination of key *Plasmodium falciparum* merozoite antigens that elicit strain-transcending parasite-neutralizing antibodies. *Infect Immun* 81: 441–451.
  45. Sheehy SH, Douglas AD, Draper SJ (2013) Challenges of assessing the clinical efficacy of asexual blood-stage *Plasmodium falciparum* malaria vaccines. *Hum Vaccin Immunother* 9: 1831–1840.
  46. Hehl AB, Lekutis C, Grigg ME, Bradley PJ, Dubremetz JF, et al. (2000) *Toxoplasma gondii* homologue of *plasmodium* apical membrane antigen 1 is involved in invasion of host cells. *Infect Immun* 68: 7078–7086.
  47. Triglia T, Healer J, Caruana SR, Hodder AN, Anders RF, et al. (2000) Apical membrane antigen 1 plays a central role in erythrocyte invasion by *Plasmodium* species. *Mol Microbiol* 38: 706–718.
  48. Bargieri DY, Andenmatten N, Lagal V, Thiberge S, Whitelaw JA, et al. (2013) Apical membrane antigen 1 mediates apicomplexan parasite attachment but is dispensable for host cell invasion. *Nat Commun* 4: 2552.
  49. Narum DL, Thomas AW (1994) Differential localization of full-length and processed forms of PF83/AMA-1 an apical membrane antigen of *Plasmodium falciparum* merozoites. *Mol Biochem Parasitol* 67: 59–68.
  50. Mitchell GH, Thomas AW, Margos G, Dluzewski AR, Bannister LH (2004) Apical membrane antigen 1, a major malaria vaccine candidate, mediates the close attachment of invasive merozoites to host red blood cells. *Infect Immun* 72: 154–158.
  51. Fraser TS, Kappe SH, Narum DL, VanBuskirk KM, Adams JH (2001) Erythrocyte-binding activity of *Plasmodium yoelii* apical membrane antigen-1 expressed on the surface of transfected COS-7 cells. *Mol Biochem Parasitol* 117: 49–59.
  52. Kato K, Mayer DC, Singh S, Reid M, Miller LH (2005) Domain III of *Plasmodium falciparum* apical membrane antigen 1 binds to the erythrocyte membrane protein Kx. *Proc Natl Acad Sci U S A* 102: 5552–5557.
  53. Giovannini D, Spath S, Lacroix C, Perazzi A, Bargieri D, et al. (2011) Independent roles of apical membrane antigen 1 and rhoptry neck proteins during host cell invasion by apicomplexa. *Cell Host Microbe* 10: 591–602.
  54. Mital J, Meissner M, Soldati D, Ward GE (2005) Conditional expression of *Toxoplasma gondii* apical membrane antigen-1 (TgAMA1) demonstrates that TgAMA1 plays a critical role in host cell invasion. *Mol Biol Cell* 16: 4341–4349.
  55. Richard D, MacRaid CA, Riglar DT, Chan JA, Foley M, et al. (2010) Interaction between *Plasmodium falciparum* apical membrane antigen 1 and the rhoptry neck protein complex defines a key step in the erythrocyte invasion process of malaria parasites. *J Biol Chem* 285: 14815–14822.
  56. Lamarque M, Besteiro S, Papoin J, Roques M, Vulliez-Le Normand B, et al. (2011) The RON2-AMA1 interaction is a critical step in moving junction-dependent invasion by apicomplexan parasites. *PLOS Pathog* 7: e1001276. doi:10.1371/journal.ppat.1001276
  57. Alexander DL, Mital J, Ward GE, Bradley P, Boothroyd JC (2005) Identification of the moving junction complex of *Toxoplasma gondii*: a collaboration between distinct secretory organelles. *PLOS Pathog* 1: e17. doi:10.1371/journal.ppat.0010017
  58. Cao J, Kaneko O, Thongkukiattul A, Tachibana M, Otsuki H, et al. (2009) Rhoptry neck protein RON2 forms a complex with microneme protein AMA1 in *Plasmodium falciparum* merozoites. *Parasitol Int* 58: 29–35.
  59. Tonkin ML, Roques M, Lamarque MH, Pugniere M, Douquet D, et al. (2011) Host cell invasion by apicomplexan parasites: insights from the co-structure of AMA1 with a RON2 peptide. *Science* 333: 463–467.
  60. Vulliez-Le Normand B, Tonkin ML, Lamarque MH, Langer S, Hoos S, et al. (2012) Structural and functional insights into the malaria parasite moving junction complex. *PLOS Pathog* 8: e1002755. doi:10.1371/journal.ppat.1002755
  61. Hodder AN, Crewther PE, Anders RF (2001) Specificity of the protective antibody response to apical membrane antigen 1. *Infect Immun* 69: 3286–3294.
  62. Collins CR, Withers-Martinez C, Hackett F, Blackman MJ (2009) An inhibitory antibody blocks interactions between components of the malarial invasion machinery. *PLOS Pathog* 5: e1000273. doi:10.1371/journal.ppat.1000273
  63. Harris KS, Casey JL, Coley AM, Masciantonio R, Sabo JK, et al. (2005) Binding hot spot for invasion inhibitory molecules on *Plasmodium falciparum* apical membrane antigen 1. *Infect Immun* 73: 6981–6989.
  64. Remarque EJ, Faber BW, Kocken CH, Thomas AW (2008) A diversity-covering approach to immunization with *Plasmodium falciparum* apical membrane antigen 1 induces broader allelic recognition and growth inhibition responses in rabbits. *Infect Immun* 76: 2660–2670.
  65. Sagara I, Dicko A, Ellis RD, Fay MP, Diawara SI, et al. (2009) A randomized controlled phase 2 trial of the blood stage AMA1-C1/Alhydrogel malaria vaccine in children in Mali. *Vaccine* 27: 3090–3098.
  66. Thera MA, Doumbo OK, Coulibaly D, Laurens MB, Ouattara A, et al. (2011) A field trial to assess a blood-stage malaria vaccine. *N Engl J Med* 365: 1004–1013.
  67. Ouattara A, Takala-Harrison S, Thera MA, Coulibaly D, Niangaly A, et al. (2013) Molecular basis of allele-specific efficacy of a blood-stage malaria vaccine: vaccine development implications. *J Infect Dis* 207: 511–519.
  68. Cowman AF, Crabb BS (2006) Invasion of red blood cells by malaria parasites. *Cell* 124: 755–766.
  69. Rayner JC (2009) The merozoite has landed: reticulocyte-binding-like ligands and the specificity of erythrocyte recognition. *Trends Parasitol* 25: 104–106.
  70. Chen L, Lopatnicki S, Riglar DT, Dekiwadia C, Uboldi AD, et al. (2011) An EGF-like protein forms a complex with PIRh5 and is required for invasion of human erythrocytes by *Plasmodium falciparum*. *PLOS Pathog* 7: e1002199. doi:10.1371/journal.ppat.1002199
  71. Baum J, Chen L, Healer J, Lopatnicki S, Boyle M, et al. (2009) Reticulocyte-binding protein homologue 5 - an essential adhesin involved in invasion of human erythrocytes by *Plasmodium falciparum*. *Int J Parasitol* 39: 371–380.
  72. Crosnier C, Bustamante LY, Bartholdson SJ, Bei AK, Theron M, et al. (2011) Basigin is a receptor essential for erythrocyte invasion by *Plasmodium falciparum*. *Nature* 480: 534–537.
  73. Bushell KM, Sollner C, Schuster-Boeckler B, Bateman A, Wright GJ (2008) Large-scale screening for novel low-affinity extracellular protein interactions. *Genome Res* 18: 622–630.
  74. Hayton K, Gaur D, Liu A, Takahashi J, Henschen B, et al. (2008) Erythrocyte binding protein PIRH5 polymorphisms determine species-specific pathways of *Plasmodium falciparum* invasion. *Cell Host Microbe* 4: 40–51.
  75. Manske M, Miotto O, Campino S, Auburn S, Almagro-Garcia J, et al. (2012) Analysis of *Plasmodium falciparum* diversity in natural infections by deep sequencing. *Nature* 487: 375–379.
  76. Bustamante LY, Bartholdson SJ, Crosnier C, Campos MG, Wanaguru M, et al. (2013) A full-length recombinant *Plasmodium falciparum* PIRH5 protein induces inhibitory antibodies that are effective across common PIRH5 genetic variants. *Vaccine* 31: 373–379.
  77. Douglas AD, Williams AR, Illingworth JJ, Kamuyu G, Biswas S, et al. (2011) The blood-stage malaria antigen PIRH5 is susceptible to vaccine-inducible cross-strain neutralizing antibody. *Nat Commun* 2: 601.
  78. Douglas AD, Williams AR, Knuepfer E, Illingworth JJ, Furze JM, et al. (2013) Neutralization of *Plasmodium falciparum* Merozoites by Antibodies against PIRH5. *J Immunol* 192: 245–258.
  79. Reddy KS, Pandey AK, Singh H, Sahar T, Emmanuel A, et al. (2014) Bacterially Expressed Full-Length Recombinant *Plasmodium falciparum* RH5 Protein Binds Erythrocytes and Elicits Potent Strain-Transcending Parasite-Neutralizing Antibodies. *Infect Immun* 82: 152–164.
  80. Patel SD, Ahouidi AD, Bei AK, Dieye TN, Mboup S, et al. (2013) *Plasmodium falciparum* merozoite surface antigen, PIRH5, elicits detectable levels of invasion-inhibiting antibodies in humans. *J Infect Dis* 208: 1679–1687.
  81. Richards JS, Arumugam TU, Reiling L, Healer J, Hodder AN, et al. (2013) Identification and prioritization of merozoite antigens as targets of protective human immunity to *Plasmodium falciparum* malaria for vaccine and biomarker development. *J Immunol* 191: 795–809.
  82. Tran TM, Ongoiba A, Coursen J, Crosnier C, Diouf A, et al. (2013) Naturally Acquired Antibodies Specific for *Plasmodium falciparum* Reticulocyte-Binding Protein Homologue 5 Inhibit Parasite Growth and Predict Protection From Malaria. *J Infect Dis* 209: 789–798.
  83. Williams AR, Douglas AD, Miura K, Illingworth JJ, Choudhary P, et al. (2012) Enhancing blockade of *Plasmodium falciparum* erythrocyte invasion: assessing combinations of antibodies against PIRH5 and other merozoite antigens. *PLOS Pathog* 8: e1002991. doi:10.1371/journal.ppat.1002991
